# Supplementary material
Source: PubMed Central journal article supplement (PMC8808756)
Supplement: ejcp-31-204-s001.pdf [file ejcp-31-204-s001.pdf]

# The impact of the COVID-19 pandemic on the diagnosis and treatment of cancer in Northern Portugal

Samantha Morais, Luís Antunes, Jéssica Rodrigues, Filipa Fontes, Maria José Bento, Nuno Lunet

## Table of Contents

|                                                                                                                                                                                                                                                                                                                                                                               |    |
|-------------------------------------------------------------------------------------------------------------------------------------------------------------------------------------------------------------------------------------------------------------------------------------------------------------------------------------------------------------------------------|----|
| <b>COVID-19 plan at IPO-Porto</b> .....                                                                                                                                                                                                                                                                                                                                       | 2  |
| <b>Figure S1.</b> Cancer cases diagnosed between 1 February and 1 July in 2019 and 2020 by weeks among all cancer cases diagnosed at the Portuguese Oncology Institute of Porto.....                                                                                                                                                                                          | 3  |
| <b>Table S1.</b> Sociodemographic, clinical and treatment characteristics of cancer cases diagnosed in February 2019 and February 2020.....                                                                                                                                                                                                                                   | 4  |
| <b>Table S2.</b> Sociodemographic, clinical and treatment characteristics of cancer cases diagnosed and treated before and after the onset of COVID-19 by month of diagnosis in 2019 and 2020 (March to June).....                                                                                                                                                            | 5  |
| <b>Table S3.A.</b> Median time in days from onset of symptoms, first medical exam and first appointment to diagnosis before and after the onset of COVID-19 (2 March to 1 July 2019 and 2 March to 1 July 2020 with follow-up to 1 July 2019 or 2020, respectively), according to sociodemographic and clinical characteristics, and month of diagnosis.....                  | 7  |
| <b>Table S3.B.</b> Median time in days from diagnosis to first appointment, multidisciplinary tumor board meeting and first treatment before and after the onset of COVID-19 (2 March to 1 July 2019 and 2 March to 1 July 2020 with follow-up to 1 July 2019 or 2020, respectively), according to sociodemographic and clinical characteristics, and month of diagnosis..... | 9  |
| <b>References</b> .....                                                                                                                                                                                                                                                                                                                                                       | 11 |

## COVID-19 plan at IPO-Porto

The key events and recommendations by IPO-Porto during the COVID-19 pandemic are presented in Fig. 1. Following the rapid spread of COVID-19 worldwide in early 2020 (World Health Organization, 2020), as part of the Containment Phase, IPO-Porto published a COVID-19 Contingency Plan on 18 February with a guide on procedures to be followed with any suspected COVID-19 case (Instituto Português de Oncologia do Porto, 2020). The first confirmed COVID-19 cases in Porto, Portugal, were reported on 2 March and the Portuguese Government declared the highest level of alert due to COVID-19 on 12 March with the country entering the Mitigation Phase as community transmission was detected (República Portuguesa, 2020). The first confirmed death due to COVID-19 was recorded in Portugal on 16 March (Direção-Geral da Saúde, 2020). Moreover, IPO-Porto disseminated several recommendations regarding surgeries, outpatient appointments, diagnostic tests and medical procedures, ambulatory care, and cancer-specific emergency service (Instituto Português de Oncologia do Porto, 2020). On the next day (17 March), IPO-Porto suspended the inclusion of new patients in clinical trials (Instituto Português de Oncologia do Porto, 2020). By 18 March, the Portuguese Government declared a State of Emergency (highest exceptional status), which was in place until 2 May when the country entered the State of Contingency (mid-exceptional status) (República Portuguesa, 2020). IPO-Porto revised their Contingency Plan considering the Mitigation Phase of COVID-19 on 19 March and a COVID-19 Crisis Office was created (Instituto Português de Oncologia do Porto, 2020). SARS-CoV-2 screening procedures were introduced at IPO-Porto on 27 March for asymptomatic patients with a scheduled surgery and symptomatic workers; these were extended to asymptomatic patients with scheduled hospitalizations on 6 April, to patients undergoing chemotherapy in the Ambulatory Service on 28 May, and finally, to overnight visitors of hospitalized patients with cancer on 5 June (Instituto Português de Oncologia do Porto, 2020). On 17 April, the Contingency Hospitalization Unit at IPO-Porto began to operate, which allowed for the interim hospitalization of suspected or confirmed COVID-19 patients (Instituto Português de Oncologia do Porto, 2020). Beginning in May, IPO-Porto stated that activity levels should gradually and progressively return to nearly regular; recommendations were published for surgeries, outpatient appointments, diagnostic tests and medical procedures, day hospital, hospitalizations, and the clinical research unit (Instituto Português de Oncologia do Porto, 2020). To accommodate for this, a second cancer-specific emergency service for the evaluation of suspected COVID-19 patients opened between 7 May and 2 June (Instituto Português de Oncologia do Porto, 2020). Guidelines for telemedicine appointments and face-to-face appointments at IPO-Porto were published on 15 June (Instituto Português de Oncologia do Porto, 2020). Finally, Portugal entered the State of Alert (lowest exceptional status) on 1 July (República Portuguesa, 2020). The main measures implemented included: mandatory confinement for patients and those under active surveillance; rules on physical distancing, mask use, respiratory hygiene, indoor and outdoor space capacity, and hours of operation are maintained; gathering limits were increased; alcohol consumption in public outdoor spaces (e.g.: beach, parks) continued to be prohibited (Governo da República Portuguesa - Ministério da Saúde, 2020).

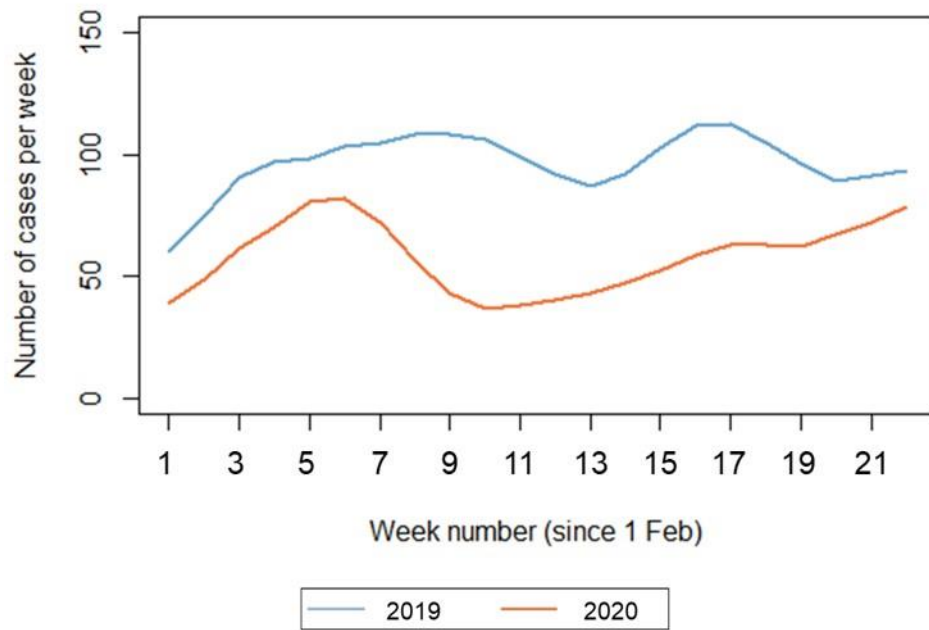

**Figure S1.** Cancer cases diagnosed between 1 February and 1 July in 2019 and 2020 by weeks among all cancer cases diagnosed at the Portuguese Oncology Institute of Porto.

**Table S1.** Sociodemographic, clinical and treatment characteristics of cancer cases diagnosed in February 2019 and February 2020.

|                                       | Cancer diagnosis              |                               | <i>p</i> -value | Proportional variation<br>% (95% CI)* |
|---------------------------------------|-------------------------------|-------------------------------|-----------------|---------------------------------------|
|                                       | February 2019<br><i>N</i> (%) | February 2020<br><i>N</i> (%) |                 |                                       |
|                                       | 320                           | 298                           |                 | -6.9 (-20.5, +9.0)                    |
| <b>Sex</b>                            |                               |                               |                 |                                       |
| Male                                  | 174 (54.4)                    | 142 (47.6)                    | 0.095           | -18.4 (-34.6, +1.9)                   |
| Female                                | 146 (45.6)                    | 156 (52.4)                    |                 | 6.8 (-14.7, +33.9)                    |
| <b>Age (years)</b>                    |                               |                               |                 |                                       |
| <55                                   | 78 (24.4)                     | 78 (26.2)                     | 0.723           | 0.0 (-26.9, +36.9)                    |
| 55-64                                 | 83 (25.9)                     | 68 (22.8)                     |                 | -18.1 (-40.5, +12.9)                  |
| 65-74                                 | 96 (30.0)                     | 86 (28.9)                     |                 | -10.4 (-33.0, +19.8)                  |
| >74                                   | 63 (19.7)                     | 66 (22.1)                     |                 | 4.8 (-25.8, +48.0)                    |
| <b>Place of residence<sup>†</sup></b> |                               |                               |                 |                                       |
| Porto Metropolitan Area               | 163 (50.9)                    | 157 (52.7)                    | 0.664           | -3.7 (-22.6, +19.9)                   |
| Outside the Porto Metropolitan Area   | 157 (49.1)                    | 141 (47.3)                    |                 | -10.2 (-28.4, +12.7)                  |
| <b>Cancer site<sup>††</sup></b>       |                               |                               |                 |                                       |
| Esophagus                             | 6 (1.9)                       | 5 (1.7)                       | 0.155           | -16.7 (-74.6, +173.0)                 |
| Stomach                               | 49 (15.3)                     | 31 (10.4)                     |                 | -36.7 (-59.5, -0.8)                   |
| Colon and rectum                      | 56 (17.5)                     | 48 (16.1)                     |                 | -14.3 (-41.7, +26.0)                  |
| Pancreas                              | 4 (1.2)                       | 11 (3.7)                      |                 | 175.0 (-12.4, +765.8)                 |
| Lung <sup>‡</sup>                     | 41 (12.8)                     | 49 (16.4)                     |                 | 19.5 (-21.1, +81.0)                   |
| Skin-melanoma                         | 19 (5.9)                      | 19 (6.4)                      |                 | 0.0 (-47.0, +88.9)                    |
| Breast <sup>‡</sup>                   | 67 (20.9)                     | 69 (23.1)                     |                 | 3.0 (-26.4, +44.1)                    |
| Cervix                                | 8 (2.5)                       | 2 (0.7)                       |                 | -75.0 (-94.7, +17.8)                  |
| Prostate                              | 47 (14.7)                     | 36 (12.1)                     |                 | -23.4 (-50.4, +18.2)                  |
| Non-Hodgkin lymphoma                  | 19 (5.9)                      | 20 (6.7)                      |                 | 5.3 (-43.8, +97.2)                    |
| Leukemia                              | 4 (1.2)                       | 8 (2.7)                       |                 | 100.0 (-39.8, +564.2)                 |

95% CI – 95% Confidence Interval; COVID-19 – Coronavirus disease 2019.

\* Calculated using *Poisson* regression.

<sup>†</sup> Porto Metropolitan Area includes the following municipalities: Arouca, Espinho, Gondomar, Maia, Matosinhos, Oliveira de Azeméis, Paredes, Porto, Póvoa de Varzim, Santa Maria da Feira, Santo Tirso, São João da Madeira, Trofa, Vale de Cambra, Valongo, Vila Nova de Gaia, Vila do Conde.

<sup>††</sup> International Statistical Classification of Diseases and Related Health Problems 10th Revision:(World Health Organization, 1992) esophagus – C15; stomach – C16; colon and rectum – C18-20; pancreas – C25; lung – C34; skin-melanoma – C43; breast – C50; cervix – C53; prostate – C61; non-Hodgkin lymphoma – C82-86, C96; leukemia – C91-95.

<sup>‡</sup> Lung: 14 left, 24 right, 3 unknowns/missing and 17 left, 8 right, 4 unknowns/missing; breast: 43 left, 23 right and 34 left, 33 right, 2 unknowns/missing; in February 2019 and February 2020, respectively.

**Table S2.** Sociodemographic, clinical and treatment characteristics of cancer cases diagnosed and treated before and after the onset of COVID-19 by month of diagnosis in 2019 and 2020 (March to June).

|                                       | Month and year of cancer diagnosis* |              |                 |              |              |                 |              |              |                 |              |              |                 |
|---------------------------------------|-------------------------------------|--------------|-----------------|--------------|--------------|-----------------|--------------|--------------|-----------------|--------------|--------------|-----------------|
|                                       | March                               |              |                 | April        |              |                 | May          |              |                 | June         |              |                 |
|                                       | 2019                                | 2020         | <i>p</i> -value | 2019         | 2020         | <i>p</i> -value | 2019         | 2020         | <i>p</i> -value | 2019         | 2020         | <i>p</i> -value |
|                                       | <i>N</i> (%)                        | <i>N</i> (%) |                 | <i>N</i> (%) | <i>N</i> (%) |                 | <i>N</i> (%) | <i>N</i> (%) |                 | <i>N</i> (%) | <i>N</i> (%) |                 |
|                                       | 323                                 | 240          |                 | 347          | 145          |                 | 414          | 206          |                 | 319          | 268          |                 |
| <b>Sex</b>                            |                                     |              |                 |              |              |                 |              |              |                 |              |              |                 |
| Male                                  | 162 (50.1)                          | 117 (48.7)   |                 | 190 (54.8)   | 71 (49.0)    |                 | 213 (51.4)   | 99 (48.1)    |                 | 173 (54.2)   | 131 (48.9)   |                 |
| Female                                | 161 (49.9)                          | 123 (51.2)   | 0.742           | 157 (45.2)   | 74 (51.0)    | 0.241           | 201 (48.5)   | 107 (51.9)   | 0.426           | 146 (45.8)   | 137 (51.1)   | 0.196           |
| <b>Age (years)</b>                    |                                     |              |                 |              |              |                 |              |              |                 |              |              |                 |
| <55                                   | 83 (25.7)                           | 67 (27.9)    |                 | 92 (26.5)    | 41 (28.3)    |                 | 93 (22.5)    | 46 (22.3)    |                 | 75 (23.5)    | 63 (23.5)    |                 |
| 55-64                                 | 85 (26.3)                           | 53 (22.1)    |                 | 83 (23.9)    | 30 (20.7)    |                 | 101 (24.4)   | 55 (26.7)    |                 | 83 (26.0)    | 63 (23.5)    |                 |
| 65-74                                 | 97 (30.0)                           | 68 (28.3)    |                 | 101 (29.1)   | 48 (33.1)    |                 | 136 (32.8)   | 61 (29.6)    |                 | 93 (29.1)    | 71 (26.5)    |                 |
| >74                                   | 58 (18.0)                           | 52 (21.7)    | 0.500           | 71 (20.5)    | 26 (17.9)    | 0.693           | 84 (20.3)    | 44 (21.4)    | 0.844           | 68 (21.3)    | 71 (26.5)    | 0.496           |
| <b>Place of residence<sup>†</sup></b> |                                     |              |                 |              |              |                 |              |              |                 |              |              |                 |
| Porto Metropolitan Area               | 179 (55.4)                          | 117 (48.7)   |                 | 164 (47.3)   | 80 (55.2)    |                 | 212 (51.2)   | 108 (52.4)   |                 | 148 (46.4)   | 128 (47.8)   |                 |
| Outside the Porto Metropolitan Area   | 144 (44.6)                          | 123 (51.3)   | 0.117           | 183 (52.7)   | 65 (44.8)    | 0.110           | 202 (48.8)   | 98 (47.6)    | 0.775           | 171 (53.6)   | 140 (52.2)   | 0.741           |
| <b>Cancer site<sup>††</sup></b>       |                                     |              |                 |              |              |                 |              |              |                 |              |              |                 |
| Esophagus                             | 4 (1.2)                             | 6 (2.5)      |                 | 9 (2.6)      | 3 (2.1)      |                 | 7 (1.7)      | 3 (1.5)      |                 | 6 (1.9)      | 4 (1.5)      |                 |
| Stomach                               | 33 (10.2)                           | 22 (9.2)     |                 | 43 (12.4)    | 7 (4.8)      |                 | 36 (8.7)     | 14 (6.8)     |                 | 31 (9.7)     | 38 (14.2)    |                 |
| Colon and rectum                      | 40 (12.4)                           | 24 (10.0)    |                 | 43 (12.4)    | 16 (11.0)    |                 | 53 (12.8)    | 27 (13.1)    |                 | 47 (14.7)    | 48 (17.9)    |                 |
| Pancreas                              | 9 (2.8)                             | 10 (4.2)     |                 | 11 (3.2)     | 10 (6.9)     |                 | 12 (2.9)     | 8 (3.9)      |                 | 7 (2.2)      | 9 (3.4)      |                 |
| Lung                                  | 48 (14.9)                           | 45 (18.7)    |                 | 54 (15.6)    | 34 (23.4)    |                 | 56 (13.5)    | 45 (21.8)    |                 | 46 (14.4)    | 39 (14.5)    |                 |
| Skin-melanoma                         | 16 (4.9)                            | 15 (6.2)     |                 | 18 (5.2)     | 7 (4.8)      |                 | 23 (5.6)     | 16 (7.8)     |                 | 23 (7.2)     | 18 (6.7)     |                 |
| Breast                                | 91 (21.2)                           | 66 (27.5)    |                 | 87 (25.1)    | 36 (24.8)    |                 | 109 (26.3)   | 56 (27.2)    |                 | 77 (24.1)    | 66 (24.6)    |                 |
| Cervix                                | 7 (2.2)                             | 4 (1.7)      |                 | 10 (2.9)     | 2 (1.4)      |                 | 9 (2.2)      | 0 (0.0)      |                 | 8 (2.5)      | 3 (1.1)      |                 |
| Prostate                              | 48 (14.9)                           | 26 (10.8)    |                 | 55 (15.8)    | 9 (6.2)      |                 | 76 (18.4)    | 15 (7.3)     |                 | 48 (15.0)    | 16 (6.0)     |                 |
| Non-Hodgkin lymphoma                  | 19 (5.9)                            | 16 (6.7)     |                 | 15 (4.3)     | 19 (13.1)    |                 | 29 (7.0)     | 17 (8.2)     |                 | 18 (5.6)     | 22 (8.2)     |                 |
| Leukemia                              | 8 (2.5)                             | 6 (2.5)      | 0.765           | 2 (0.6)      | 2 (1.4)      | <0.001          | 4 (1.0)      | 5 (2.4)      | 0.003           | 8 (2.5)      | 5 (1.9)      | 0.047           |
| <b>Stage<sup>¶</sup></b>              |                                     |              |                 |              |              |                 |              |              |                 |              |              |                 |
| I                                     | 102 (34.5)                          | 60 (27.5)    |                 | 112 (33.9)   | 36 (29.0)    |                 | 147 (38.6)   | 54 (29.4)    |                 | 91 (31.1)    | 65 (27.0)    |                 |
| II                                    | 66 (22.3)                           | 48 (22.0)    |                 | 70 (21.2)    | 11 (8.9)     |                 | 73 (19.2)    | 39 (21.2)    |                 | 66 (22.5)    | 52 (21.6)    |                 |
| III                                   | 53 (17.9)                           | 36 (16.5)    |                 | 61 (18.5)    | 21 (16.9)    |                 | 70 (18.4)    | 23 (12.5)    |                 | 60 (20.5)    | 33 (13.7)    |                 |
| IV                                    | 69 (23.3)                           | 61 (28.0)    |                 | 79 (23.9)    | 48 (38.7)    |                 | 76 (19.9)    | 49 (26.6)    |                 | 67 (22.9)    | 58 (24.1)    |                 |
| Missing                               | 6 (2.0)                             | 13 (6.0)     | 0.078           | 8 (2.4)      | 8 (6.4)      | 0.001           | 15 (3.9)     | 19 (10.3)    | 0.002           | 9 (3.1)      | 33 (13.7)    | <0.001          |
| <b>Symptomatic</b>                    |                                     |              |                 |              |              |                 |              |              |                 |              |              |                 |
| No                                    | 114 (35.3)                          | 68 (28.3)    |                 | 128 (36.9)   | 31 (21.4)    |                 | 163 (39.4)   | 64 (31.1)    |                 | 114 (35.7)   | 61 (22.8)    |                 |
| Yes                                   | 190 (58.8)                          | 153 (63.8)   |                 | 199 (57.3)   | 104 (71.7)   |                 | 216 (52.2)   | 133 (64.6)   |                 | 185 (58.0)   | 190 (70.9)   |                 |
| Unknown                               | 19 (5.9)                            | 19 (7.9)     | 0.178           | 20 (5.8)     | 10 (6.9)     | 0.004           | 35 (8.4)     | 9 (4.4)      | 0.008           | 20 (6.3)     | 17 (6.3)     | 0.002           |

| Referral pathway                                    |                                |            |                  |            |           |                  |            |            |                  |            |            |                  |
|-----------------------------------------------------|--------------------------------|------------|------------------|------------|-----------|------------------|------------|------------|------------------|------------|------------|------------------|
| Doctor                                              | 155 (48.0)                     | 139 (57.9) |                  | 179 (51.6) | 70 (48.3) |                  | 217 (52.4) | 118 (57.3) |                  | 168 (52.7) | 156 (58.2) |                  |
| Another hospital                                    | 108 (33.4)                     | 70 (29.2)  |                  | 117 (33.7) | 53 (36.5) |                  | 143 (34.5) | 58 (28.2)  |                  | 110 (34.5) | 75 (28.0)  |                  |
| Organized screening                                 | 43 (13.3)                      | 14 (5.8)   |                  | 37 (10.7)  | 5 (3.4)   |                  | 39 (9.4)   | 10 (4.8)   |                  | 23 (7.2)   | 9 (3.4)    |                  |
| Opportunistic screening                             | 8 (2.5)                        | 6 (2.5)    |                  | 9 (2.6)    | 1 (0.7)   |                  | 5 (1.2)    | 4 (1.9)    |                  | 9 (2.8)    | 5 (1.9)    |                  |
| Appointment                                         | 8 (2.5)                        | 7 (2.9)    |                  | 4 (1.1)    | 13 (9.0)  |                  | 10 (2.4)   | 14 (6.8)   |                  | 8 (2.5)    | 20 (7.5)   |                  |
| Missing                                             | 1 (0.3)                        | 4 (1.7)    | <b>0.016</b>     | 1 (0.3)    | 3 (2.1)   | <b>&lt;0.001</b> | 0 (0.0)    | 2 (1.0)    | <b>0.004</b>     | 1 (0.3)    | 3 (1.1)    | <b>0.006</b>     |
| First treatment                                     |                                |            |                  |            |           |                  |            |            |                  |            |            |                  |
| Surgery                                             | 127 (39.3)                     | 78 (32.5)  |                  | 134 (38.6) | 35 (24.1) |                  | 132 (31.9) | 59 (28.6)  |                  | 114 (35.7) | 46 (17.2)  |                  |
| Radiotherapy                                        | 40 (12.4)                      | 14 (5.8)   |                  | 56 (16.1)  | 15 (10.3) |                  | 74 (17.9)  | 9 (4.4)    |                  | 32 (10.0)  | 12 (4.5)   |                  |
| Brachytherapy                                       | 4 (1.2)                        | 5 (2.1)    |                  | 5 (1.4)    | 0 (0.0)   |                  | 9 (2.2)    | 0 (0.0)    |                  | 8 (2.5)    | 0 (0.0)    |                  |
| Systemic treatment                                  |                                |            |                  |            |           |                  |            |            |                  |            |            |                  |
| Chemotherapy                                        | 78 (24.1)                      | 59 (24.6)  |                  | 66 (19.0)  | 32 (22.1) |                  | 73 (17.6)  | 45 (21.8)  |                  | 63 (19.7)  | 51 (19.0)  |                  |
| Chemoradiotherapy                                   | 6 (1.9)                        | 1 (0.4)    |                  | 5 (1.4)    | 0 (0.0)   |                  | 9 (2.2)    | 0 (0.0)    |                  | 6 (1.9)    | 2 (0.7)    |                  |
| Immunotherapy                                       | 1 (0.3)                        | 1 (0.4)    |                  | 2 (0.6)    | 1 (0.7)   |                  | 0 (0.0)    | 2 (1.0)    |                  | 1 (0.3)    | 2 (0.7)    |                  |
| Targeted therapy                                    | 3 (0.9)                        | 5 (2.1)    |                  | 3 (0.9)    | 10 (6.9)  |                  | 4 (1.0)    | 4 (1.9)    |                  | 2 (0.6)    | 5 (1.9)    |                  |
| Hormone therapy                                     | 19 (5.9)                       | 1 (0.4)    |                  | 18 (5.2)   | 6 (4.1)   |                  | 20 (4.8)   | 9 (4.4)    |                  | 21 (6.6)   | 8 (3.0)    |                  |
| Other                                               | 1 (0.3)                        | 1 (0.4)    |                  | 0 (0.0)    | 0 (0.0)   |                  | 0 (0.0)    | 0 (0.0)    |                  | 0 (0.0)    | 2 (0.7)    |                  |
| None (as of July 1 <sup>st</sup> ) <sup>§</sup>     | 44 (13.6)                      | 59 (24.6)  | <b>&lt;0.001</b> | 58 (16.7)  | 46 (31.7) | <b>&lt;0.001</b> | 93 (22.5)  | 78 (37.9)  | <b>&lt;0.001</b> | 72 (22.6)  | 140 (52.2) | <b>&lt;0.001</b> |
| Complications                                       |                                |            |                  |            |           |                  |            |            |                  |            |            |                  |
| Anastomotic dehiscence (Yes) <sup>  </sup>          | 4 (3.1)                        | 1 (1.3)    | 0.400            | 3 (2.2)    | 1 (2.9)   | 0.830            | 1 (0.8)    | 0 (0.0)    | 0.503            | 2 (1.7)    | 0 (0.0)    | 0.366            |
| Clavien-Dindo Classification <sup>  </sup>          | (Clavien <i>et al.</i> , 2009) |            |                  |            |           |                  |            |            |                  |            |            |                  |
| None                                                | 113 (89.0)                     | 69 (88.5)  |                  | 114 (85.1) | 33 (94.3) |                  | 115 (87.1) | 57 (96.6)  |                  | 104 (91.2) | 40 (87.0)  |                  |
| I-II                                                | 9 (7.1)                        | 5 (6.4)    |                  | 11 (8.2)   | 1 (2.9)   |                  | 11 (8.3)   | 1 (1.7)    |                  | 6 (5.3)    | 5 (10.9)   |                  |
| III-V                                               | 5 (3.9)                        | 4 (5.1)    | 0.909            | 9 (6.7)    | 1 (2.9)   | 0.352            | 6 (4.5)    | 1 (1.7)    | 0.124            | 4 (3.5)    | 1 (2.2)    | 0.416            |
| Cancer-specific emergency visits (Yes) <sup>#</sup> | 59 (18.3)                      | 55 (23.4)  | 0.142            | 66 (19.3)  | 37 (25.9) | 0.106            | 38 (9.4)   | 29 (14.2)  | 0.074            | 10 (3.1)   | 10 (3.8)   | 0.689            |
| Hospitalizations (Yes) <sup>#</sup>                 | 157 (48.8)                     | 98 (41.7)  | 0.099            | 124 (36.3) | 50 (35.0) | 0.787            | 47 (11.6)  | 38 (18.6)  | <b>0.019</b>     | 13 (4.1)   | 17 (6.4)   | 0.213            |

COVID-19 – Coronavirus disease 2019.

\* Twenty-seven cases diagnosed on 1 July 2019 and seven cases diagnosed on 1 July 2020 not included.

<sup>†</sup> Porto Metropolitan Area includes the following municipalities: Arouca, Espinho, Gondomar, Maia, Matosinhos, Oliveira de Azeméis, Paredes, Porto, Póvoa de Varzim, Santa Maria da Feira, Santo Tirso, São João da Madeira, Trofa, Vale de Cambra, Valongo, Vila Nova de Gaia, Vila do Conde.

<sup>††</sup> International Statistical Classification of Diseases and Related Health Problems 10th Revision: (World Health Organization, 1992) esophagus – C15; stomach – C16; colon and rectum – C18-20; pancreas – C25; lung – C34; skin-melanoma – C43; breast – C50; cervix – C53; prostate – C61; non-Hodgkin lymphoma – C82-86, C96; leukemia – C91-95.

<sup>‡</sup> Solid tumors only.

<sup>§</sup> Reasons for no treatment: March – 23 and 36 cases awaiting treatment to begin; 3 and 5 cases with cancer too advanced for treatment; 5 and 7 cases cannot undergo treatment due to current physical condition; 6 and 3 cases currently under surveillance; 7 and 8 cases died before any treatment in 2019 and 2020, respectively. April – 26 and 31 cases awaiting treatment to begin; 6 and 4 cases with cancer too advanced for treatment; 12 and 6 cases cannot undergo treatment due to current physical condition; 7 and 3 cases currently under surveillance; 7 and 2 cases died before any treatment in 2019 and 2020, respectively. May – 58 and 61 cases awaiting treatment to begin; 7 and 6 cases with cancer too advanced for treatment; 6 and 6 cases cannot undergo treatment due to current physical condition; 18 and 2 cases currently under surveillance; 4 and 3 cases died before any treatment in 2019 and 2020, respectively. June – 44 and 122 cases awaiting treatment to begin; 6 and 5 cases with cancer too advanced for treatment; 1 and 6 cases cannot undergo treatment due to current physical condition; 8 and 1 cases currently under surveillance; 13 and 6 cases died before any treatment in 2019 and 2020, respectively.

<sup>||</sup> Among those who underwent surgery as first treatment (127 in March, 134 in April, 132 in May, 114 in June 2019; 78 in March, 35 in April, 59 in May, 46 in June 2020).

<sup>#</sup> Among 322 patients with cancer in March, 342 in April, 405 in May, 317 in June 2019, and 235 patients with cancer in March, 143 in April, 204 in May, 266 in June 2020.

**Table S3.A.** Median time in days from onset of symptoms, first medical exam and first appointment to diagnosis before and after the onset of COVID-19 (2 March to 1 July 2019 and 2 March to 1 July 2020 with follow-up to 1 July 2019 or 2020, respectively), according to sociodemographic and clinical characteristics, and month of diagnosis.

|                         |                                            | Onset of symptoms and diagnosis |                  |              | First medical exam and diagnosis |                  |                  | First appointment and diagnosis |                  |                  |
|-------------------------|--------------------------------------------|---------------------------------|------------------|--------------|----------------------------------|------------------|------------------|---------------------------------|------------------|------------------|
|                         |                                            | Total (N)                       | Median (P25-P75) | p-value      | Total (N)                        | Median (P25-P75) | p-value          | Total (N)                       | Median (P25-P75) | p-value          |
| <b>ALL</b>              | <i>Before</i>                              | 567                             | 84 (41-150)      |              | 1254                             | 39 (14-64)       |                  | 364                             | 36 (15-46)       |                  |
|                         | <i>After</i>                               | 448                             | 71 (39-129)      | <b>0.020</b> | 788                              | 21 (8-53)        | <b>&lt;0.001</b> | 243                             | 16 (8-36)        | <b>&lt;0.001</b> |
| <b>SEX</b>              | <b>Males</b>                               |                                 |                  |              |                                  |                  |                  |                                 |                  |                  |
|                         | <i>Before</i>                              | 283                             | 90 (41-146)      |              | 648                              | 39 (13-77)       |                  | 138                             | 26 (8-50)        |                  |
|                         | <i>After</i>                               | 202                             | 75 (40-129)      | 0.312        | 381                              | 24 (7-61)        | <b>0.001</b>     | 108                             | 20 (7-42)        | 0.136            |
|                         | <b>Females</b>                             |                                 |                  |              |                                  |                  |                  |                                 |                  |                  |
|                         | <i>Before</i>                              | 284                             | 80 (44-168)      |              | 606                              | 39 (14-57)       |                  | 226                             | 36 (23-44)       |                  |
|                         | <i>After</i>                               | 246                             | 71 (38-127)      | <b>0.025</b> | 407                              | 20 (9-47)        | <b>&lt;0.001</b> | 135                             | 15 (9-28)        | <b>&lt;0.001</b> |
| <b>AGE (years)</b>      | <b>&lt;55</b>                              |                                 |                  |              |                                  |                  |                  |                                 |                  |                  |
|                         | <i>Before</i>                              | 165                             | 73 (39-150)      |              | 303                              | 29 (10-53)       |                  | 95                              | 35 (12-46)       |                  |
|                         | <i>After</i>                               | 126                             | 60 (34-106)      | 0.119        | 201                              | 16 (6-34)        | <b>0.029</b>     | 60                              | 15 (6-22)        | <b>0.001</b>     |
|                         | <b>55-64</b>                               |                                 |                  |              |                                  |                  |                  |                                 |                  |                  |
|                         | <i>Before</i>                              | 120                             | 93 (50-151)      |              | 320                              | 48 (19-64)       |                  | 106                             | 39 (28-45)       |                  |
|                         | <i>After</i>                               | 98                              | 72 (38-125)      | 0.078        | 182                              | 24 (8-55)        | <b>0.001</b>     | 61                              | 15 (8-30)        | <b>&lt;0.001</b> |
|                         | <b>65-74</b>                               |                                 |                  |              |                                  |                  |                  |                                 |                  |                  |
|                         | <i>Before</i>                              | 154                             | 82 (39-146)      |              | 374                              | 44 (16-69)       |                  | 108                             | 35 (13-47)       |                  |
|                         | <i>After</i>                               | 121                             | 75 (44-132)      | 0.469        | 233                              | 24 (9-58)        | <b>0.003</b>     | 73                              | 18 (7-38)        | 0.281            |
|                         | <b>&gt;74</b>                              |                                 |                  |              |                                  |                  |                  |                                 |                  |                  |
|                         | <i>Before</i>                              | 130                             | 96 (48-168)      |              | 257                              | 33 (14-67)       |                  | 55                              | 24 (12-42)       |                  |
|                         | <i>After</i>                               | 103                             | 80 (46-160)      | 0.574        | 172                              | 21 (7-63)        | 0.231            | 46                              | 28 (12-45)       | 0.532            |
| <b>RESIDENCE*</b>       | <b>Porto Metropolitan Area</b>             |                                 |                  |              |                                  |                  |                  |                                 |                  |                  |
|                         | <i>Before</i>                              | 283                             | 80 (40-147)      |              | 627                              | 37 (13-63)       |                  | 169                             | 35 (13-48)       |                  |
|                         | <i>After</i>                               | 237                             | 72 (39-127)      | 0.144        | 398                              | 22 (8-55)        | <b>0.001</b>     | 138                             | 16 (8-36)        | <b>0.004</b>     |
|                         | <b>Outside the Porto Metropolitan Area</b> |                                 |                  |              |                                  |                  |                  |                                 |                  |                  |
|                         | <i>Before</i>                              | 284                             | 85 (48-158)      |              | 627                              | 40 (14-64)       |                  | 195                             | 36 (17-45)       |                  |
|                         | <i>After</i>                               | 211                             | 71 (40-132)      | 0.080        | 390                              | 21 (8-52)        | <b>&lt;0.001</b> | 105                             | 15 (8-36)        | <b>0.024</b>     |
|                         | <b>Esophagus</b>                           |                                 |                  |              |                                  |                  |                  |                                 |                  |                  |
|                         | <i>Before</i>                              | 20                              | 90 (41-124)      |              | 25                               | 12 (2-35)        |                  | 2                               | 14 (14-34)       |                  |
|                         | <i>After</i>                               | 13                              | 68 (39-145)      | 0.875        | 17                               | 7 (1-22)         | 0.210            | 2                               | 8 (8-24)         | 0.433            |
|                         | <b>Stomach</b>                             |                                 |                  |              |                                  |                  |                  |                                 |                  |                  |
| <i>Before</i>           | 74                                         | 69 (36-129)                     |                  | 140          | 6 (2-19)                         |                  | 12               | 84 (7-105)                      |                  |                  |
| <i>After</i>            | 46                                         | 65 (49-95)                      | 0.993            | 75           | 8 (2-20)                         | 0.867            | 8                | 14 (6-32)                       | <b>0.014</b>     |                  |
| <b>Colon and rectum</b> |                                            |                                 |                  |              |                                  |                  |                  |                                 |                  |                  |
| <i>Before</i>           | 85                                         | 94 (55-159)                     |                  | 174          | 10 (3-41)                        |                  | 11               | 42 (12-55)                      |                  |                  |
| <i>After</i>            | 71                                         | 80 (50-161)                     | 0.841            | 112          | 10 (3-36)                        | 0.828            | 17               | 29 (10-69)                      | 0.697            |                  |
| <b>Pancreas</b>         |                                            |                                 |                  |              |                                  |                  |                  |                                 |                  |                  |
| <i>Before</i>           | 30                                         | 71 (39-144)                     |                  | 34           | 50 (27-123)                      |                  | 20               | 36 (15-50)                      |                  |                  |
| <i>After</i>            | 28                                         | 75 (29-160)                     | 0.928            | 33           | 22 (13-49)                       | 0.085            | 13               | 11 (8-19)                       | <b>0.036</b>     |                  |
| <b>Lung</b>             |                                            |                                 |                  |              |                                  |                  |                  |                                 |                  |                  |
| <i>Before</i>           | 115                                        | 95 (46-144)                     |                  | 194          | 39 (18-63)                       |                  | 79               | 26 (8-48)                       |                  |                  |
| <i>After</i>            | 84                                         | 89 (40-150)                     | 0.962            | 151          | 28 (9-71)                        | 0.841            | 68               | 28 (13-44)                      | 0.342            |                  |
| <b>Skin-melanoma</b>    |                                            |                                 |                  |              |                                  |                  |                  |                                 |                  |                  |
| <i>Before</i>           | 20                                         | 73 (28-205)                     |                  | 58           | 15 (5-23)                        |                  | 4                | 10 (8-11)                       |                  |                  |
| <i>After</i>            | 11                                         | 129 (94-375)                    | 0.214            | 45           | 73 (49-239)                      | <b>0.007</b>     | 4                | 12 (1-103)                      | 0.221            |                  |

|                                 |                                                   |              |              |              |            |                  |              |            |              |                  |
|---------------------------------|---------------------------------------------------|--------------|--------------|--------------|------------|------------------|--------------|------------|--------------|------------------|
| CANCER GROUP <sup>††</sup>      | <b>Breast</b>                                     |              |              |              |            |                  |              |            |              |                  |
|                                 | <i>Before</i>                                     | 119          | 70 (37-154)  |              | 340        | 42 (16-57)       |              | 177        | 38 (29-43)   |                  |
|                                 | <i>After</i>                                      | 110          | 56 (34-99)   | <b>0.015</b> | 207        | 20 (12-38)       | <b>0.002</b> | 88         | 15 (12-21)   | <b>&lt;0.001</b> |
|                                 | <b>Cervix</b>                                     |              |              |              |            |                  |              |            |              |                  |
|                                 | <i>Before</i>                                     | 19           | 122 (50-177) |              | 24         | 28 (12-71)       |              | 2          | 16 (16-48)   |                  |
|                                 | <i>After</i>                                      | 5            | 37 (27-94)   | <b>0.037</b> | 7          | 19 (9-58)        | 0.555        | 1          | --           | --               |
|                                 | <b>Prostate</b>                                   |              |              |              |            |                  |              |            |              |                  |
|                                 | <i>Before</i>                                     | 12           | 118 (49-249) |              | 173        | 71 (36-123)      |              | 27         | 68 (23-110)  |                  |
|                                 | <i>After</i>                                      | 4            | 90 (68-105)  | 0.159        | 54         | 61 (28-88)       | 0.055        | 11         | 12 (10-48)   | <b>0.025</b>     |
|                                 | <b>Non-Hodgkin lymphoma</b>                       |              |              |              |            |                  |              |            |              |                  |
| <i>Before</i>                   | 54                                                | 73 (45-150)  |              | 73           | 40 (18-67) |                  | 23           | 15 (6-23)  |              |                  |
| <i>After</i>                    | 49                                                | 65 (41-134)  | 0.337        | 70           | 21 (8-40)  | <b>0.018</b>     | 23           | 9 (4-21)   | 0.795        |                  |
| <b>Leukemia</b>                 |                                                   |              |              |              |            |                  |              |            |              |                  |
| <i>Before</i>                   | 5                                                 | 24 (10-80)   |              | 19           | 24 (2-30)  |                  | 7            | 2 (1-3)    |              |                  |
| <i>After</i>                    | 2                                                 | 34 (24-68)   | 0.521        | 17           | 3 (1-21)   | <b>0.031</b>     | 8            | 1 (1-1)    | <b>0.016</b> |                  |
| STAGE <sup>††</sup>             | <b>Digestive</b>                                  |              |              |              |            |                  |              |            |              |                  |
|                                 | <i>Before</i>                                     | 346          | 89 (42-146)  |              | 373        | 12 (3-47)        |              | 45         | 42 (15-75)   |                  |
|                                 | <i>After</i>                                      | 205          | 75 (47-152)  | 0.825        | 237        | 12 (3-31)        | 0.312        | 40         | 14 (8-36)    | <b>0.005</b>     |
|                                 | <b>Lymphoid, hematopoietic and related tissue</b> |              |              |              |            |                  |              |            |              |                  |
|                                 | <i>Before</i>                                     | 59           | 69 (35-150)  |              | 92         | 32 (14-59)       |              | 30         | 8 (2-21)     |                  |
|                                 | <i>After</i>                                      | 51           | 61 (34-115)  | 0.134        | 87         | 16 (5-38)        | <b>0.008</b> | 31         | 6 (1-16)     | 0.620            |
|                                 | <b>I</b>                                          |              |              |              |            |                  |              |            |              |                  |
|                                 | <i>Before</i>                                     | 259          | 80 (41-192)  |              | 408        | 47 (18-63)       |              | 172        | 39 (29-48)   |                  |
|                                 | <i>After</i>                                      | 126          | 55 (25-123)  | 0.129        | 203        | 27 (12-78)       | 0.391        | 71         | 20 (13-52)   | 0.339            |
|                                 | <b>II</b>                                         |              |              |              |            |                  |              |            |              |                  |
| <i>Before</i>                   | 210                                               | 87 (35-151)  |              | 239          | 44 (18-72) |                  | 54           | 39 (22-49) |              |                  |
| <i>After</i>                    | 104                                               | 63 (38-106)  | 0.155        | 137          | 21 (9-61)  | <b>0.018</b>     | 41           | 13 (8-22)  | <b>0.011</b> |                  |
| <b>III</b>                      |                                                   |              |              |              |            |                  |              |            |              |                  |
| <i>Before</i>                   | 208                                               | 103 (49-175) |              | 218          | 39 (15-66) |                  | 34           | 32 (10-52) |              |                  |
| <i>After</i>                    | 84                                                | 71 (39-147)  | 0.103        | 104          | 21 (7-37)  | <b>0.004</b>     | 28           | 18 (13-45) | 0.767        |                  |
| <b>IV</b>                       |                                                   |              |              |              |            |                  |              |            |              |                  |
| <i>Before</i>                   | 214                                               | 84 (45-144)  |              | 273          | 26 (7-56)  |                  | 70           | 21 (8-41)  |              |                  |
| <i>After</i>                    | 145                                               | 78 (44-143)  | 0.903        | 201          | 23 (8-44)  | 0.152            | 67           | 16 (8-30)  | 0.096        |                  |
| MONTH OF DIAGNOSIS <sup>§</sup> | <b>March</b>                                      |              |              |              |            |                  |              |            |              |                  |
|                                 | <i>Before</i>                                     | 138          | 74 (41-150)  |              | 292        | 41 (12-67)       |              | 113        | 40 (16-48)   |                  |
|                                 | <i>After</i>                                      | 115          | 63 (34-119)  | 0.605        | 216        | 26 (14-58)       | 0.132        | 68         | 18 (10-39)   | <b>0.029</b>     |
|                                 | <b>April</b>                                      |              |              |              |            |                  |              |            |              |                  |
|                                 | <i>Before</i>                                     | 147          | 90 (38-145)  |              | 314        | 40 (12-61)       |              | 100        | 35 (21-47)   |                  |
|                                 | <i>After</i>                                      | 79           | 74 (40-115)  | 0.208        | 130        | 28 (9-60)        | 0.192        | 48         | 22 (8-38)    | 0.067            |
|                                 | <b>May</b>                                        |              |              |              |            |                  |              |            |              |                  |
|                                 | <i>Before</i>                                     | 155          | 90 (47-151)  |              | 359        | 39 (16-61)       |              | 93         | 35 (12-42)   |                  |
|                                 | <i>After</i>                                      | 102          | 74 (50-143)  | 0.480        | 130        | 18 (8-63)        | <b>0.006</b> | 58         | 14 (8-33)    | 0.109            |
|                                 | <b>June</b>                                       |              |              |              |            |                  |              |            |              |                  |
| <i>Before</i>                   | 123                                               | 93 (42-167)  |              | 279          | 34 (14-61) |                  | 58           | 31 (13-40) |              |                  |
| <i>After</i>                    | 146                                               | 73 (39-129)  | <b>0.014</b> | 245          | 15 (6-33)  | <b>&lt;0.001</b> | 67           | 14 (8-25)  | <b>0.047</b> |                  |

COVID-19 – Coronavirus disease 2019; P25-P75 – Percentiles 25 and 75.

\* Porto Metropolitan Area includes the following municipalities: Arouca, Espinho, Gondomar, Maia, Matosinhos, Oliveira de Azeméis, Paredes, Porto, Póvoa de Varzim, Santa Maria da Feira, Santo Tirso, São João da Madeira, Trofa, Vale de Cambra, Valongo, Vila Nova de Gaia, Vila do Conde.

† International Statistical Classification of Diseases and Related Health Problems 10th Revision: (World Health Organization, 1992) esophagus – C15; stomach – C16; colon and rectum – C18-20; pancreas – C25; lung – C34; skin-melanoma – C43; breast – C50; cervix – C53; prostate – C61; non-Hodgkin lymphoma – C82-86, C96; leukemia – C91-95.

†† Digestive (C15, C16, C18-20, C25); Lymphoid, hematopoietic and related tissue (C82-86, C91-96).

†† Solid tumors only.

§ Twenty-seven cases diagnosed on 1 July 2019 and seven cases diagnosed on 1 July 2020 not included.



**Table S3.B.** Median time in days from diagnosis to first appointment, multidisciplinary tumor board meeting and first treatment before and after the onset of COVID-19 (2 March to 1 July 2019 and 2 March to 1 July 2020 with follow-up to 1 July 2019 or 2020, respectively), according to sociodemographic and clinical characteristics, and month of diagnosis.

|                         |                                        | Diagnosis and first appointment |                  |         | Diagnosis and multidisciplinary tumor board meeting* |                  |         | Diagnosis and first treatment |                  |         |
|-------------------------|----------------------------------------|---------------------------------|------------------|---------|------------------------------------------------------|------------------|---------|-------------------------------|------------------|---------|
|                         |                                        | Total (N)                       | Median (P25-P75) | p-value | Total (N)                                            | Median (P25-P75) | p-value | Total (N)                     | Median (P25-P75) | p-value |
| ALL                     | Before                                 | 1066                            | 34 (20-..)       |         | 1398                                                 | 46 (24-98)       |         | 1430                          | 84 (57-..)       |         |
|                         | After                                  | 623                             | 22 (14-..)       | <0.001  | 856                                                  | 35 (18-63)       | <0.001  | 866                           | 80 (51-..)       | <0.001  |
| SEX                     | <b>Males</b>                           |                                 |                  |         |                                                      |                  |         |                               |                  |         |
|                         | Before                                 | 615                             | 42 (21-..)       |         | 735                                                  | 61 (31-114)      |         | 786                           | 117 (62-..)      |         |
|                         | After                                  | 310                             | 24 (14-..)       | <0.001  | 405                                                  | 36 (20-74)       | <0.001  | 418                           | 89 (45-..)       | 0.001   |
|                         | <b>Females</b>                         |                                 |                  |         |                                                      |                  |         |                               |                  |         |
|                         | Before                                 | 451                             | 27 (18-..)       |         | 663                                                  | 36 (18-67)       |         | 677                           | 72 (54-112)      |         |
|                         | After                                  | 313                             | 21 (13-..)       | <0.001  | 441                                                  | 34 (16-58)       | 0.117   | 448                           | 76 (57-115)      | <0.001  |
| AGE (years)             | <b>&lt;55</b>                          |                                 |                  |         |                                                      |                  |         |                               |                  |         |
|                         | Before                                 | 254                             | 23 (15-..)       |         | 340                                                  | 40 (20-68)       |         | 349                           | 71 (49-113)      |         |
|                         | After                                  | 160                             | 20 (13-28)       | 0.008   | 214                                                  | 34 (15-62)       | 0.328   | 220                           | 78 (54-115)      | 0.001   |
|                         | <b>55-64</b>                           |                                 |                  |         |                                                      |                  |         |                               |                  |         |
|                         | Before                                 | 252                             | 35 (20-..)       |         | 354                                                  | 50 (24-88)       |         | 358                           | 86 (61-..)       |         |
|                         | After                                  | 140                             | 24 (13-..)       | 0.001   | 201                                                  | 34 (18-63)       | <0.001  | 201                           | 71 (47-..)       | 0.421   |
|                         | <b>65-74</b>                           |                                 |                  |         |                                                      |                  |         |                               |                  |         |
|                         | Before                                 | 326                             | 40 (22-..)       |         | 425                                                  | 49 (25-109)      |         | 434                           | 90 (57-..)       |         |
|                         | After                                  | 175                             | 24 (15-..)       | <0.001  | 245                                                  | 35 (20-65)       | <0.001  | 251                           | 87 (48-..)       | 0.001   |
|                         | <b>&gt;74</b>                          |                                 |                  |         |                                                      |                  |         |                               |                  |         |
|                         | Before                                 | 234                             | 38 (22-..)       |         | 279                                                  | 56 (28-..)       |         | 289                           | 110 (61-..)      |         |
|                         | After                                  | 148                             | 25 (13-..)       | <0.001  | 186                                                  | 37 (18-70)       | <0.001  | 194                           | 89 (62-..)       | 0.005   |
| RESIDENCE†              | <b>Porto Metropolitan Area</b>         |                                 |                  |         |                                                      |                  |         |                               |                  |         |
|                         | Before                                 | 545                             | 34 (18-..)       |         | 697                                                  | 48 (25-102)      |         | 714                           | 84 (56-..)       |         |
|                         | After                                  | 300                             | 21 (13-..)       | <0.001  | 423                                                  | 31 (17-58)       | <0.001  | 438                           | 73 (47-..)       | 0.113   |
|                         | <b>Outside Porto Metropolitan Area</b> |                                 |                  |         |                                                      |                  |         |                               |                  |         |
|                         | Before                                 | 521                             | 34 (21-..)       |         | 701                                                  | 45 (23-91)       |         | 716                           | 89 (58-..)       |         |
|                         | After                                  | 323                             | 23 (14-..)       | <0.001  | 423                                                  | 39 (21-66)       | 0.006   | 428                           | 88 (57-..)       | <0.001  |
|                         | <b>Esophagus</b>                       |                                 |                  |         |                                                      |                  |         |                               |                  |         |
|                         | Before                                 | 25                              | 13 (8-34)        |         | 27                                                   | 48 (41-74)       |         | 27                            | .. (83-..)       |         |
|                         | After                                  | 16                              | 29 (10-..)       | 0.206   | 18                                                   | 53 (35-70)       | 0.752   | 18                            | 88 (68-..)       | 0.589   |
|                         | <b>Stomach</b>                         |                                 |                  |         |                                                      |                  |         |                               |                  |         |
| Before                  | 135                                    | 28 (17-45)                      |                  | 141     | 45 (35-75)                                           |                  | 147     | 89 (66-..)                    |                  |         |
| After                   | 73                                     | 15 (10-28)                      | <0.001           | 79      | 29 (18-45)                                           | <0.001           | 81      | 75 (56-..)                    | 0.418            |         |
| <b>Colon and rectum</b> |                                        |                                 |                  |         |                                                      |                  |         |                               |                  |         |
| Before                  | 173                                    | 21 (14-..)                      |                  | 176     | 38 (28-55)                                           |                  | 184     | 69 (51-95)                    |                  |         |
| After                   | 98                                     | 15 (9-..)                       | <0.001           | 110     | 26 (18-41)                                           | <0.001           | 115     | 67 (44-89)                    | 0.429            |         |
| <b>Pancreas</b>         |                                        |                                 |                  |         |                                                      |                  |         |                               |                  |         |
| Before                  | 21                                     | 20 (14-34)                      |                  | 37      | 28 (14-59)                                           |                  | 41      | 67 (57-..)                    |                  |         |
| After                   | 24                                     | 24 (9-..)                       | 0.403            | 33      | 24 (17-58)                                           | 0.703            | 37      | 94 (93-..)                    | 0.303            |         |
| <b>Lung</b>             |                                        |                                 |                  |         |                                                      |                  |         |                               |                  |         |
| Before                  | 130                                    | 34 (25-..)                      |                  | 203     | 39 (17-68)                                           |                  | 209     | 76 (47-95)                    |                  |         |
| After                   | 96                                     | 28 (19-53)                      | 0.116            | 161     | 34 (18-66)                                           | 0.644            | 164     | 68 (41-89)                    | 0.025            |         |
| <b>Skin-melanoma</b>    |                                        |                                 |                  |         |                                                      |                  |         |                               |                  |         |
| Before                  | 77                                     | 43 (28-..)                      |                  | 77      | 87 (53-92)                                           |                  | 81      | 110 (110-..)                  |                  |         |
| After                   | 52                                     | 32 (21-43)                      | 0.056            | 52      | .. (72-..)                                           | 0.227            | 56      | .. (108-..)                   | <0.001           |         |
| CANCER SITE††           | <b>Breast</b>                          |                                 |                  |         |                                                      |                  |         |                               |                  |         |
|                         | Before                                 | 193                             | 24 (17-..)       |         | 368                                                  | 28 (14-56)       |         | 370                           | 70 (54-112)      |         |
|                         | After                                  | 139                             | 18 (13-28)       | 0.001   | 225                                                  | 30 (14-54)       | 0.709   | 227                           | 78 (65-111)      | <0.001  |

|                                        |                                                   |            |            |        |            |             |        |            |             |
|----------------------------------------|---------------------------------------------------|------------|------------|--------|------------|-------------|--------|------------|-------------|
|                                        | <b>Cervix</b>                                     |            |            |        |            |             |        |            |             |
|                                        | <i>Before</i>                                     | 33         | 63 (28-..) |        | 35         | 63 (38-..)  |        | 35         | .. (61-..)  |
|                                        | <i>After</i>                                      | 8          | 62 (17-68) | 0.292  | 9          | 41 (35-68)  | 0.221  | 9          | 87 (73-..)  |
|                                        | <b>Prostate</b>                                   |            |            |        |            |             |        |            |             |
|                                        | <i>Before</i>                                     | 206        | 80 (50-..) |        | 232        | 109 (87-..) |        | 233        | .. (..-..)  |
|                                        | <i>After</i>                                      | 55         | 45 (24-..) | <0.001 | 66         | 77 (29-115) | <0.001 | 66         | .. (106-..) |
|                                        | <b>Non-Hodgkin lymphoma</b>                       |            |            |        |            |             |        |            |             |
|                                        | <i>Before</i>                                     | 58         | 27 (16-..) |        | 80         | 48 (27-71)  |        | 81         | 51 (20-..)  |
|                                        | <i>After</i>                                      | 52         | 23 (15-34) | 0.135  | 75         | 35 (21-50)  | 0.028  | 75         | 41 (25-70)  |
|                                        | <b>Leukemia</b>                                   |            |            |        |            |             |        |            |             |
|                                        | <i>Before</i>                                     | 15         | 2 (2-..)   |        | 22         | 23 (16-26)  |        | 22         | 28 (7-..)   |
|                                        | <i>After</i>                                      | 10         | 3 (3-..)   | 0.830  | 8          | 16 (6-27)   | 0.442  | 18         | 13 (2-43)   |
| <b>CANCER GROUP<sup>¶</sup></b>        | <b>Digestive</b>                                  |            |            |        |            |             |        |            |             |
|                                        | <i>Before</i>                                     | 354        | 23 (14-..) |        | 381        | 42 (29-63)  |        | 399        | 74 (57-..)  |
|                                        | <i>After</i>                                      | 211        | 17 (9-29)  | <0.001 | 240        | 29 (18-49)  | <0.001 | 251        | 84 (53-..)  |
|                                        | <b>Lymphoid, hematopoietic and related tissue</b> |            |            |        |            |             |        |            |             |
|                                        | <i>Before</i>                                     | 73         | 27 (16-..) |        | 102        | 42 (21-71)  |        | 103        | 51 (17-..)  |
|                                        | <i>After</i>                                      | 62         | 23 (14-34) | 0.130  | 93         | 34 (20-47)  | 0.025  | 93         | 40 (21-64)  |
| <b>STAGE<sup>§</sup></b>               | <b>I</b>                                          |            |            |        |            |             |        |            |             |
|                                        | <i>Before</i>                                     | 283        | 30 (21-..) |        | 438        | 39 (17-73)  |        | 455        | 74 (59-112) |
|                                        | <i>After</i>                                      | 145        | 21 (15-34) | <0.001 | 204        | 31 (15-62)  | 0.090  | 216        | 88 (71-..)  |
|                                        | <b>II</b>                                         |            |            |        |            |             |        |            |             |
|                                        | <i>Before</i>                                     | 228        | 45 (21-..) |        | 277        | 63 (32-..)  |        | 282        | .. (69-..)  |
|                                        | <i>After</i>                                      | 110        | 21 (14-50) | <0.001 | 149        | 56 (25-77)  | 0.006  | 151        | 89 (72-..)  |
|                                        | <b>III</b>                                        |            |            |        |            |             |        |            |             |
|                                        | <i>Before</i>                                     | 212        | 42 (18-..) |        | 242        | 50 (29-91)  |        | 246        | 85 (57-..)  |
|                                        | <i>After</i>                                      | 85         | 20 (10-27) | <0.001 | 112        | 37 (18-60)  | <0.001 | 113        | 72 (51-106) |
|                                        | <b>IV</b>                                         |            |            |        |            |             |        |            |             |
|                                        | <i>Before</i>                                     | 227        | 29 (16-..) |        | 294        | 43 (24-75)  |        | 297        | 82 (46-..)  |
|                                        | <i>After</i>                                      | 152        | 22 (13-..) | 0.005  | 215        | 28 (18-50)  | <0.001 | 219        | 65 (40-..)  |
| <b>MONTH OF DIAGNOSIS<sup>  </sup></b> | <b>March</b>                                      |            |            |        |            |             |        |            |             |
|                                        | <i>Before</i>                                     | 210        | 28 (16-62) |        | 310        | 38 (17-74)  |        | 323        | 76 (54-..)  |
|                                        | <i>After</i>                                      | 172        | 24 (14-47) | 0.119  | 234        | 41 (20-70)  | 0.998  | 240        | 84 (58-..)  |
|                                        | <b>April</b>                                      |            |            |        |            |             |        |            |             |
|                                        | <i>Before</i>                                     | 247        | 31 (20-51) |        | 336        | 44 (22-87)  |        | 347        | .. (56-..)  |
|                                        | <i>After</i>                                      | 97         | 21 (13-39) | 0.001  | 141        | 29 (18-51)  | <0.001 | 145        | 70 (40-..)  |
| <b>May</b>                             |                                                   |            |            |        |            |             |        |            |             |
| <i>Before</i>                          | 321                                               | 39 (18-..) |            | 409    | .. (28-..) |             | 414    | .. (..-..) |             |
| <i>After</i>                           | 148                                               | 21 (11-30) | <0.001     | 202    | 29 (16-53) | <0.001      | 206    | .. (49-..) |             |
| <b>June</b>                            |                                                   |            |            |        |            |             |        |            |             |
| <i>Before</i>                          | 261                                               | .. (24-..) |            | 316    | .. (..-..) |             | 319    | .. (..-..) |             |
| <i>After</i>                           | 201                                               | .. (14-..) | <0.001     | 262    | .. (..-..) | 0.009       | 268    | .. (..-..) |             |

COVID-19 – Coronavirus disease 2019; P25-P75 – Percentiles 25 and 75.

.. – Not yet available.

\* 32 and 20 cancer cases had a multidisciplinary tumor board meeting before diagnosis in 2019 and 2020, respectively.

† Porto Metropolitan Area includes the following municipalities: Arouca, Espinho, Gondomar, Maia, Matosinhos, Oliveira de Azeméis, Paredes, Porto, Póvoa de Varzim, Santa Maria da Feira, Santo Tirso, São João da Madeira, Trofa, Vale de Cambra, Valongo, Vila Nova de Gaia, Vila do Conde.

‡ International Statistical Classification of Diseases and Related Health Problems 10th Revision: (World Health Organization, 1992) esophagus – C15; stomach – C16; colon and rectum – C18-20; pancreas – C25; lung – C34; skin-melanoma – C43; breast – C50; cervix – C53; prostate – C61; non-Hodgkin lymphoma – C82-86, C96; leukemia – C91-95.

¶ Digestive (C15, C16, C18-20, C25); Lymphoid, hematopoietic and related tissue (C82-86, C91-96).

§ Solid tumors only.

|| Twenty-seven cases diagnosed on 1 July 2019 and seven cases diagnosed on 1 July 2020 not included.

## References

Clavien PA, Barkun J, de Oliveira ML, Vauthey JN, Dindo D, Schulick RD et al. (2009). The Clavien-Dindo classification of surgical complications: five-year experience. *Ann Surg* 250(2):187-196. doi: 10.1097/SLA.0b013e3181b13ca2.

Direção-Geral da Saúde. Novo Coronavírus COVID-19 - Relatório de Situação [New Coronavirus COVID-19 - Situation Report]. Lisbon, Portugal 2020.

Governo da República Portuguesa - Ministério da Saúde. Portugal avança para Estado de alerta [Portugal advances to the State of Alert]. Lisbon, Portugal 2020.

Instituto Português de Oncologia do Porto. Medidas COVID-19 [COVID-19 Measures]. Porto, Portugal 2020.

República Portuguesa. Não paramos - Estamos on: Resposta de Portugal à COVID-19 [We don't stop - We are on: Portugal's response to COVID-19]. Lisbon, Portugal 2020.

World Health Organization. International Statistical Classification of Diseases and Related Health Problems 10th Revision. Geneva, Switzerland 1992.

World Health Organization. Timeline: WHO's COVID-19 response. Geneva, Switzerland 2020.
